# Supplementary material
Source: HighWire-hosted journal article supplement (https://openheart.bmj.com/content/6/1/e000864)
Supplement: inline-supplementary-material-2 [file inline-supplementary-material-2.docx]

eTable I: Search strategy utilised

1 exp Acetylcysteine/

2 exp Nicorandil/

3 exp Bicarbonates/

4 exp Thioctic Acid/

5 exp Anticholesteremic Agents/ or exp Hydroxymethylglutaryl-CoA Reductase Inhibitors/ or statin.mp. or exp Pravastatin/ or exp Lovastatin/

6 exp Amlodipine/

7 ebselen.mp.

8 exp Fenoldopam/

9 anisodamine.mp.

10 exp Theophylline/

11 exp Pentoxifylline/

12 exp Trimetazidine/

13 exp Ascorbic Acid/

14 exp Acute Kidney Injury/

15 Cardiac Catheterization/ae [Adverse Effects] {Including Related Terms}

16 Contrast Media/ae [Adverse Effects] {Including Related Terms}

17 (contrast adj3 nephro*).ab,ti.

18 Coronary Angiography/

19 1 or 2 or 3 or 4 or 5 or 6 or 7 or 8 or 9 or 10 or 11 or 12 or 13

20 14 or 15 or 16 or 17

21 18 and 19 and 20

22 limit 21 to (english language and humans and (clinical trial, all or clinical trial, phase i or clinical trial, phase ii or clinical trial, phase iii or clinical trial, phase iv or clinical trial or comparative study or controlled clinical trial or evaluation studies or meta analysis or randomized controlled trial or "review" or systematic reviews))
