# Supplementary material
Source: HighWire-hosted journal article supplement (https://openheart.bmj.com/content/6/1/e000864)
Supplement: inline-supplementary-material-3 [file inline-supplementary-material-3.docx]

eTable II. Excluded papers and reason for exclusion.

| **First Author** | **Year of Publication** | **Reason for exclusion** |
| --- | --- | --- |
| Abaci O | 2015 | Not CAG |
| Acikel S | 2010 | Not CKD |
| ACT Investigators | 2011 | Not CAG |
| Addad F | 2014 | Control group Not NACl hydration |
| Albabtain | 2013 | Not CKD |
| Alessandri N | 2013 | Not RCT |
| Andreotti | 2007 | Not RCT |
| Andreucci M | 2014 | Not RCT |
| Arici M | 2003 | Not CKD |
| Aslanger E | 2012 | Not CKD |
| Aspelin P | 2004 | Not RCT |
| Atar S | 2014 | Control group Not NACl hydration |
| Attallah N | 2004 | Not RCT |
| Avci E | 2011 | Control group Not NACl hydration |
| Awal A | 2011 | No full paper |
| Azmus Ad | 2005 | Not CKD |
| Baranska-Kosakowska | 2007 | Not CKD |
| Barbieri L | 2014 | Meta analysis |
| Barbieri L | 2014 | Meta analysis (Not a repeat) |
| Barbieri L | 2015 | Other (Not drug trial) |
| Barrett B | 2006 | Not RCT |
| Bei W | 2017 | Not RCT |
| Ben-Assa E | 2014 | Not CAG |
| Berwanger | 2013 | Not CKD |
| Bidram P | 2015 | Not CKD |
| Biesenbach | 2010 | Not RCT |
| Bilasy M.E | 2012 | Control group Not NACl hydration |
| Boccalandro F | 2003 | Not RCT |
| Bocksch W | 2005 | Not RCT |
| Bohm I | 2006 | Not RCT |
| Bolognese L | 2010 | Not CKD |
| Bonello L | 2007 | Not CKD |
| Boscheri | 2007 | No full paper |
| Boucek P | 2013 | Not CAG |
| Bouzas-Mosquera A | 2009 | Not CKD |
| Brignole M | 2004 | Not RCT |
| Briguori C | 2004 | Control group Not NACl hydration |
| Briguori C | 2007 | Control group Not NACl hydration |
| Briguori C | 2002 | Not CAG |
| Brindis R.G | 2006 | Not RCT |
| Brown JR | 2016 | Meta analysis |
| Budhiraja | 2009 | Not RCT |
| Buyukhatipoglu H | 2010 | Not CKD |
| Calabro P | 2011 | Not CKD |
| Canavese C | 2004 | Not CKD |
| Carbonell N | 2007 | Not CKD |
| Cavusoglu E | 2004 | Not RCT |
| Chang | 2013 | Not RCT |
| Chen | 2009 | Not English |
| Chen S.L | 2008 | Control group Not NACl hydration |
| Chockalingam A | 2010 | Not RCT |
| Chrissoheris M.P | 2006 | Not RCT |
| Chyou A.C. | 2015 | Not RCT |
| Cicek | 2013 | Not CKD |
| Claessen B.E. | 2013 | Not RCT |
| Corti | 2002 | Not RCT |
| Coyle L.C | 2006 | Not CKD |
| Curhan | 2003 | Not RCT |
| Davidson C.J | 2008 | Not RCT |
| Deftereos S | 2013 | Not CKD |
| Desai C.S. | 2014 | Not RCT |
| Diaz G | 2011 | Not RCT |
| Dong Y | 2016 | Meta analysis |
| Drager | 2004 | Other (not CIN) |
| Duong M.H | 2005 | Meta analysis |
| Dussol B | 2006 | Not CAG |
| Efrati S | 2003 | Not RCT |
| El-Hajjar | 2008 | Not CAG |
| Elshawadfy M | 2011 | Control group Not NACl hydration |
| Erley | 1994 | Pre 1999 |
| Erley | 1999 | Not CAG |
| EuroPCR | 2011 | Not RCT |
| Faubel S | 2012 | Not RCT |
| Ferrario F | 2009 | Not CAG |
| Firouzi A | 2012 | Not CKD |
| Froehlich J.B | 2009 | Not RCT |
| Fung | 2007 | Not RCT |
| Gami A.S | 2004 | Not RCT |
| Gandhi | 1992 | Pre 1999 |
| Gandhi S | 2014 | Meta analysis |
| Gandhi S | 2015 | Not RCT |
| Gershlick A.H | 2015 | Not CAG |
| Giacoppo D | 2017 | Meta analysis |
| Giacoppo D | 2014 | Meta analysis |
| Goldenberg I | 2005 | Not RCT |
| Goldenberg I | 2003 | No full paper |
| Gomes V.C.P. | 2003 | No full paper |
| Guo-Qiang G. | 2013 | Not CKD |
| Habib M | 2016 | Not CKD |
| Hafiz Am | 2012 | Not CAG |
| Haipeng H | 2012 | Not English |
| Hamdi | 2012 | Not CKD |
| Han S | 2013 | Not CKD |
| Heinrich M.C. | 2009 | Meta analysis |
| Heng Ae | 2008 | Control group Not NACl hydration |
| Herzog C.A | 2008 | Not RCT |
| Herzog C.A | 2007 | Not RCT |
| Heyman S.N | 2013 | Not RCT |
| Holscher B | 2008 | Not RCT |
| Hoshino | 2007 | Not English |
| Huber | 2002 | Not CAG |
| Ibrahim A.E. | 2014 | Not RCT |
| Inda-Filho A.J | 2014 | Not CKD |
| Isenbarger D.W | 2003 | Meta analysis |
| Izani Wan Mohamed W.M | 2008 | No full paper |
| Jo Sh | 2009 | Control group Not NACl hydration |
| Juergens, C P | 2009 | Other (not drug trial) |
| Kagen A | 2010 | Not RCT |
| Kamiyama | 2008 | Not RCT |
| Kandula P | 2010 | Not CKD |
| Kandzari D.E | 2003 | Not RCT |
| Kapadia C.B. | 2014 | Meta analysis |
| Kapoor A | 2002 | Not CKD |
| Katholi | 1995 | Pre 1999 |
| Kaya A | 2013 | Control group Not NACl hydration |
| Kefer J M | 2003 | Not CKD |
| Khanal S | 2005 | Not CKD |
| Kim B J | 2010 | Not CKD |
| Kinbara T | 2010 | Not CKD |
| Kini A.A | 2001 | Not RCT |
| Koc F | 2013 | Not CKD |
| Kolonko | 1998 | Pre 1999 |
| Kotlyar E | 2005 | Not CAG |
| Kumar N | 2009 | Not RCT |
| Kunadian V | 2011 | Meta analysis |
| Lam | 1988 | Not CAG |
| Laurent Bayard Y | 2011 | Not RCT |
| Lee J.M | 2014 | Meta analysis |
| Lee P.T | 2009 | Not RCT |
| Lee S W | 2011 | Control group Not NACl hydration |
| Lekston A | 2009 | Not RCT |
| Lemeire N | 2008 | Not RCT |
| Lemeire N | 2007 | Not RCT |
| Leoncini M. | 2014 | Not CKD |
| Levine G.N | 2011 | Not RCT |
| Li G. | 2009 | Not CKD |
| Li H | 2016 | Meta analysis |
| Li H | 2014 | Control group Not NACl hydration |
| Li J | 2014 | Not RCT |
| Li J | 2011 | Not RCT |
| Li R | 2012 | Not CKD |
| Liang M | 2017 | Meta analysis |
| Liew Y.P | 2005 | Not RCT |
| Lin J. | 2010 | Not English |
| Liu W.J | 2013 | Control group Not NACl hydration |
| Liu Y.H | 2015 | Meta analysis |
| Locatelli | 2007 | Not RCT |
| Locatelli F | 2008 | Not RCT |
| Maaz S.H. | 2013 | Control group Not NACl hydration |
| Madyoon H | 2001 | Not RCT |
| Mahmoud | 2003 | Not English |
| Maioli M | 2008 | Control group Not NACl hydration |
| Maioli, M | 2011 | Not CKD |
| Masuda M | 2007 | Not CKD |
| Mathur V S. | 2001 | Not RCT |
| Mccullough | 2011 | Not RCT |
| Mccullough | 2013 | Not RCT |
| Mccullough P.A. | 2006 | Not RCT |
| Meena DS | 2017 | Not RCT |
| Mehran R | 2009 | Control group Not NACl hydration |
| Mehta S.K | 2005 | Not RCT |
| Meier P | 2013 | Not RCT |
| Meine | 2004 | Meta analysis |
| Meng | 2006 | Not CAG |
| Merten | 2004 | Not CAG |
| Messenger J.C | 2009 | Not RCT |
| Meyer | 2013 | Not RCT |
| Mikhailidis | 2014 | Not RCT |
| Misra D | 2004 | Meta analysis |
| Mitchell R.L | 2004 | Not RCT |
| Morcos S.K | 2005 | Not RCT |
| Morikawa S | 2009 | Control group Not NACl hydration |
| Najjar M | 2015 | Not CAG |
| Nakamura A | 2013 | Control group Not NACl hydration |
| Nawa T | 2015 | Other (cystatin c used as measure CKD) |
| Needham E | 2005 | Not RCT |
| Nguyen-Ho P.D.V. | 2003 | No full paper |
| Nunag M | 2009 | Not RCT |
| Nusca A | 2008 | Not RCT |
| Ohno I | 2012 | Not RCT |
| Oldemeyer J | 2002 | No full paper |
| Onuigbo M.A.C | 2011 | Not CAG |
| Oudemans-Van Straaten H.M | 2005 | Not RCT |
| Ozcan O.U | 2015 | Other (not drug trial) |
| Ozhan H | 2010 | Not CKD |
| Pakfetrat M | 2009 | Not CKD |
| Palevsky P.M | 2009 | Not RCT |
| Pappy R | 2011 | Meta analysis |
| Paraskevas | 2011 | Not RCT |
| Park K.H | 2012 | Not CKD |
| Pate G.H.K | 2003 | No full paper |
| Patti G | 2008 | Not CKD |
| Patti G | 2011 | Not CKD |
| Pearlman D.M | 2013 | Meta analysis |
| Pickard J.M.J | 2014 | Not RCT |
| Poon M. | 2006 | Not RCT |
| Pucelikova T | 2008 | Not RCT |
| Quantavalle C. | 2013 | Not RCT |
| Rahman M M | 2012 | No full paper |
| Ramanathan | 2001 | Not RCT |
| Ramesh | 2006 | Not RCT |
| Ratcliffe J.A | 2009 | Not all CKD |
| Recio-Mayoral | 2007 | no CKD |
| Rezkalla | 2004 | Not CKD |
| Richard Conti C | 2003 | Not RCT |
| Richenberg J | 2012 | Not RCT |
| Rihal C.S | 1998 | Pre 1999 |
| Ritchie J | 2011 | Not RCT |
| Romanello M | 2014 | Meta analysis |
| Rosenstock J.L | 2010 | Not CAG |
| Rosenstock J.L | 2008 | Control group Not NACl hydration |
| Rudnick M.R | 2008 | Control group Not NACl hydration |
| Rudnick M.R | 1994 | Pre 1999 |
| Ruirui | 2012 | Not CKD |
| Sadamatsu K | 2007 | Not RCT |
| Sadat | 2013 | Meta analysis |
| Sakurai R | 2012 | Meta analysis |
| Sanaei-Ardenkani M | 2005 | Not RCT |
| Scheller B | 2007 | Not RCT |
| Schmidt P | 2007 | Control group Not NACl hydration |
| Schneider L.M | 2007 | Not RCT |
| Selmi W | 2013 | Meta analysis |
| Shalansky S.J | 2005 | Not RCT |
| Shammas N.W | 2001 | Not CKD |
| Shavit | 2009 | Control group Not NACl hydration |
| Sheahan R.G | 2002 | Not RCT |
| Shehata | 2014 | Control group Not NACl hydration |
| Shehata M | 2015 | Control group Not NACl hydration |
| Shin D.H | 2011 | Other (not drug trial) |
| Sholy | 2012 | Not RCT |
| Sinhal A | 2008 | Not RCT |
| Smiseth O.A. | 2004 | Not RCT |
| Sochman J | 2006 | Control group Not NACl hydration |
| Solomon R | 2014 | Not RCT |
| Solomon R | 2007 | Not RCT |
| Solomon R | 2007 | Control group Not NACl hydration |
| Solomon R | 2007 | Not RCT |
| Solomon R.J | 2008 | Not RCT |
| Spargias K | 2009 | Control group Not NACl hydration |
| Stacul | 2011 | Not RCT |
| Stacul F | 2006 | Not RCT |
| Staniloae C.S | 2009 | Control group Not NACl hydration |
| Stone G.W | 2001 | Not RCT |
| Sudarsky D | 2011 | Not RCT |
| Tadros G.M | 2003 | Not RCT |
| Tamai N | 2012 | Control group Not NACl hydration |
| Tctap Summit | 2014 | Not RCT |
| Teirstein P.S | 2006 | Control group Not NACl hydration |
| Tepel M | 2006 | Not RCT |
| Tepel M | 2000 | Not CAG |
| Thiele H | 2010 | Not CKD |
| Toprak O | 2006 | Not RCT |
| Toso | 2011 | Other (not CIN) |
| Toso A. | 2010 | Control group Not NACl hydration |
| Trivedi H | 2010 | Meta analysis |
| Trost J.C | 2011 | Not RCT |
| Tumlin | 2000 | No full paper |
| Turedi S | 2016 | Not CAG |
| Ueda H | 2011 | Control group Not NACl hydration |
| Ukaigwe A | 2014 | Meta analysis |
| Vaitkus | 2002 | Not RCT |
| Vallabhajosyula S | 2015 | Not RCT |
| Vallero | 2002 | Not English |
| Vasheghani-Farahani A | 2009 | Not CKD |
| Verghese P.S | 2014 | Not RCT |
| Vesnina | 2009 | Not CKD |
| Wang | 2008 | Not CKD |
| Weisberg L.S | 1994 | Pre 1999 |
| Weisbord S.D | 2012 | Not RCT |
| Weisbord S.D | 2010 | Not RCT |
| Weisbord S.D | 2005 | Not RCT |
| Wong E.M.L | 2006 | Not RCT |
| Wong G.T.C | 2007 | Not RCT |
| Wu H. | 2015 | Meta analysis |
| X.-P Hua | 2010 | Not English |
| Xinwei J | 2009 | Control group Not NACl hydration |
| Yang E.H | 2011 | Not RCT |
| Yin | 2009 | Not English |
| Yoshida S | 2009 | Not RCT |
| Zagler A | 2006 | Meta analysis |
| Zehra J | 2012 | Not CKD |
| Zhang | 2011 | Not RCT |
| Zhang B.C | 2011 | Meta analysis |
| Zhao J.L | 2009 | Not CKD |
| Zhou | 2011 | Not RCT |
| Zhou X | 2009 | Control group Not NACl hydration |
