# Supplementary material
Source: HighWire-hosted journal article supplement (https://openheart.bmj.com/content/6/1/e000864)
Supplement: inline-supplementary-material-9 [file inline-supplementary-material-9.docx]

eTable IV: subgroup analysis by trial publication date

| **Stratum** | **N/n** | **OR** | **95% CI** | **I2** |
| --- | --- | --- | --- | --- |
| 1999 - 2004 | 14/1661 | 0.57 | 0.43, 0.77 | 56 |
| 2005 – present | 13/4033 | 0.89 | 0.73, 1.09 | 0 |
| 1999 - 2005 | 16/1867 | 0.61 | 0.46, 0.80 | 52 |
| 2006 - present | 11/3827 | 0.88 | 0.71, 1.08 | 0 |
| 1999 – 2006 | As above (no 2006 papers) | | | |
| 2007 - present |
| 1999 - 2007 | 18/2184 | 0.60 | 0.46, 0/79 | 46 |
| 2008 - present | 9/3510 | 0.90 | 0.73, 1.11 | 0 |
| 1999 - 2008 | 20/2396 | 0.62 | 0.48, 0.80 | 41 |
| 2009 - present | 7/3298 | 0.92 | 0.73, 1.13 | 0 |
| 1999 - 2009 | 23/2709 | 0.62 | 0.49, 0.79 | 40 |
| 2010 - present | 4/2985 | 0.94 | 0.75, 1.19 | 0 |
